# Supplementary material for: Investigating the formation of diverse ZnO nanostructures based on solvent, temperature, and pH as adjustable parameters
Source: Royal Society of Chemistry journal article supplement (doi:10.1039/d0ma00781a), 2020-12-10
Supplement: d0ma00781a1.pdf [file d0ma00781a1.pdf]

## Electronic Supplementary Information

### **Investigating the formation of diverse ZnO nanostructures based on solvent, temperature, and pH as adjustable parameters**

Smriti Thakur and Sanjay K. Mandal\*

Department of Chemical Sciences, Indian Institute of Science Education and Research Mohali, Sector 81, Manauli PO, S.A.S. Nagar, Mohali, Punjab 140306, INDIA.

#### **Corresponding Author**

\*Email: [sanjaymandal@iisermohali.ac.in](mailto:sanjaymandal@iisermohali.ac.in)

## Table of Contents

| Section | Description                                             | Page No |
|---------|---------------------------------------------------------|---------|
| S-1     | Lattice parameters of as-synthesized ZnO nanostructures | S3-S5   |
| S-2     | Band Gap values of ZnO nanostructures                   | S6      |
| S-3     | TEM images of ZnO nanostructures (ZnO-9 and ZnO-12)     | S7      |
| S-4     | FESEM images of ZnO nanostructures (ZnO-15 to ZnO-17)   | S8-S10  |

## Section-S1: Lattice parameters of as-synthesized ZnO nanostructures

**Table S1.** Lattice parameters for ZnO nanostructures (**ZnO-1** to **ZnO-5**).

| Sample       | hkl   | 2 $\theta$ values<br>(degrees) | Lattice constants<br>a, b, c (Å) | Volume of<br>unit cell (Å <sup>3</sup> ) | APF   | d spacings<br>(Å) |
|--------------|-------|--------------------------------|----------------------------------|------------------------------------------|-------|-------------------|
| <b>ZnO-1</b> | (100) | 31.49                          | a = b = 3.28,<br>c = 5.26        | 49.11                                    | 0.755 | 2.84              |
|              | (002) | 34.13                          |                                  |                                          |       | 2.63              |
|              | (101) | 35.95                          |                                  |                                          |       | 2.50              |
| <b>ZnO-2</b> | (100) | 31.51                          | a = b = 3.28,<br>c = 5.25        | 49.10                                    | 0.755 | 2.84              |
|              | (002) | 34.14                          |                                  |                                          |       | 2.62              |
|              | (101) | 36.04                          |                                  |                                          |       | 2.49              |
| <b>ZnO-3</b> | (100) | 31.45                          | a = b = 3.28,<br>c = 5.26        | 49.23                                    | 0.755 | 2.84              |
|              | (002) | 34.11                          |                                  |                                          |       | 2.63              |
|              | (101) | 35.94                          |                                  |                                          |       | 2.50              |
| <b>ZnO-4</b> | (100) | 31.46                          | a = b = 3.28,<br>c = 5.25        | 49.17                                    | 0.755 | 2.84              |
|              | (002) | 34.16                          |                                  |                                          |       | 2.62              |
|              | (101) | 35.95                          |                                  |                                          |       | 2.50              |
| <b>ZnO-5</b> | (100) | 31.46                          | a = b = 3.28,<br>c = 5.25        | 49.16                                    | 0.755 | 2.84              |
|              | (002) | 34.14                          |                                  |                                          |       | 2.62              |
|              | (101) | 35.97                          |                                  |                                          |       | 2.50              |

**Table S2.** Lattice parameters for ZnO nanostructures (**ZnO-6** to **ZnO-13**).

| Sample        | h k l | 2 $\theta$ values<br>(degrees) | Lattice constants<br>a, b, c (Å) | Volume of<br>unit cell (Å <sup>3</sup> ) | APF   | d<br>spacing (Å) | FWHM  |
|---------------|-------|--------------------------------|----------------------------------|------------------------------------------|-------|------------------|-------|
| <b>ZnO-6</b>  | (100) | 31.44                          | a = b = 3.29,                    | 49.41                                    | 0.755 | 2.85             | 0.492 |
|               | (002) | 34.11                          | c = 5.26                         |                                          |       | 2.63             |       |
|               | (101) | 35.94                          |                                  |                                          |       | 2.50             |       |
| <b>ZnO-7</b>  | (100) | 31.42                          | a = b = 3.29,                    | 49.52                                    | 0.755 | 2.85             | 0.491 |
|               | (002) | 34.07                          | c = 5.27                         |                                          |       | 2.63             |       |
|               | (101) | 35.91                          |                                  |                                          |       | 2.50             |       |
| <b>ZnO-8</b>  | (100) | 31.40                          | a = b = 3.29,                    | 49.61                                    | 0.755 | 2.85             | 0.338 |
|               | (002) | 34.05                          | c = 5.27                         |                                          |       | 2.63             |       |
|               | (101) | 35.87                          |                                  |                                          |       | 2.51             |       |
| <b>ZnO-9</b>  | (100) | 31.40                          | a = b = 3.29,                    | 49.60                                    | 0.755 | 2.85             | 0.334 |
|               | (002) | 34.06                          | c = 5.27                         |                                          |       | 2.63             |       |
|               | (101) | 35.89                          |                                  |                                          |       | 2.51             |       |
| <b>ZnO-10</b> | (100) | 31.41                          | a = b = 3.29,                    | 49.58                                    | 0.755 | 2.85             | 0.311 |
|               | (002) | 34.06                          | c = 5.27                         |                                          |       | 2.63             |       |
|               | (101) | 35.89                          |                                  |                                          |       | 2.50             |       |
| <b>ZnO-11</b> | (100) | 31.54                          | a = b = 3.28,                    | 48.97                                    | 0.755 | 2.85             | 0.358 |
|               | (002) | 34.19                          | c = 5.25                         |                                          |       | 2.63             |       |
|               | (101) | 36.02                          |                                  |                                          |       | 2.50             |       |
| <b>ZnO-12</b> | (100) | 31.44                          | a = b = 3.29,                    | 49.40                                    | 0.755 | 2.85             | 0.265 |
|               | (002) | 34.10                          | c = 5.26                         |                                          |       | 2.63             |       |
|               | (101) | 35.93                          |                                  |                                          |       | 2.50             |       |
| <b>ZnO-13</b> | (100) | 31.41                          | a = b = 3.29,                    | 49.53                                    | 0.755 | 2.85             | 0.258 |
|               | (002) | 34.07                          | c = 5.27                         |                                          |       | 2.63             |       |
|               | (101) | 35.90                          |                                  |                                          |       | 2.50             |       |

**Table S3.** Lattice parameters for ZnO nanostructures (**ZnO-14h** to **ZnO-17h**).

| Sample         | h k l | 2 $\theta$ values<br>(degrees) | Lattice<br>constants<br>a, b, c (Å) | Volume of unit<br>cell (Å <sup>3</sup> ) | APF   | d<br>spacings (Å) |
|----------------|-------|--------------------------------|-------------------------------------|------------------------------------------|-------|-------------------|
| <b>ZnO-14h</b> | (100) | 31.69                          | a = b = 3.26,                       | 48.07                                    | 0.754 | 2.82              |
|                | (002) | 34.45                          | c = 5.22                            |                                          |       | 2.61              |
|                | (101) | 36.23                          |                                     |                                          |       | 2.48              |
| <b>ZnO-15h</b> | (100) | 31.74                          | a = b = 3.26,                       | 48.08                                    | 0.755 | 2.82              |
|                | (002) | 34.44                          | c = 5.22                            |                                          |       | 2.61              |
|                | (101) | 36.22                          |                                     |                                          |       | 2.48              |
| <b>ZnO-16h</b> | (100) | 31.74                          | a = b = 3.25,                       | 48.14                                    | 0.755 | 2.82              |
|                | (002) | 34.42                          | c = 5.20                            |                                          |       | 2.61              |
|                | (101) | 36.21                          |                                     |                                          |       | 2.48              |
| <b>ZnO-17h</b> | (100) | 31.73                          | a = b = 3.25,                       | 48.14                                    | 0.755 | 2.82              |
|                | (002) | 34.42                          | c = 5.20                            |                                          |       | 2.61              |
|                | (101) | 36.23                          |                                     |                                          |       | 2.48              |

## Section S-2: Band Gap values of ZnO nanostructures

**Table S4.** Band gap values of as-synthesized ZnO nanostructures in different solvents

| Sample | Band Gap ( $E_g$ ) (eV) |
|--------|-------------------------|
| ZnO-1  | 3.17                    |
| ZnO-2  | 3.11                    |
| ZnO-3  | 3.08                    |
| ZnO-4  | 3.01                    |
| ZnO-5  | 3.06                    |

**Table S5.** Band gap values of as-synthesized ZnO nanoflowers at different temperatures

| Sample | Band Gap ( $E_g$ ) (eV) |
|--------|-------------------------|
| ZnO-6  | 3.14                    |
| ZnO-7  | 3.15                    |
| ZnO-8  | 3.16                    |
| ZnO-9  | 3.17                    |
| ZnO-10 | 3.10                    |
| ZnO-11 | 3.15                    |
| ZnO-12 | 3.16                    |
| ZnO-13 | 3.17                    |

Section-S3: TEM images of ZnO nanostructures (ZnO-9 and ZnO-12)

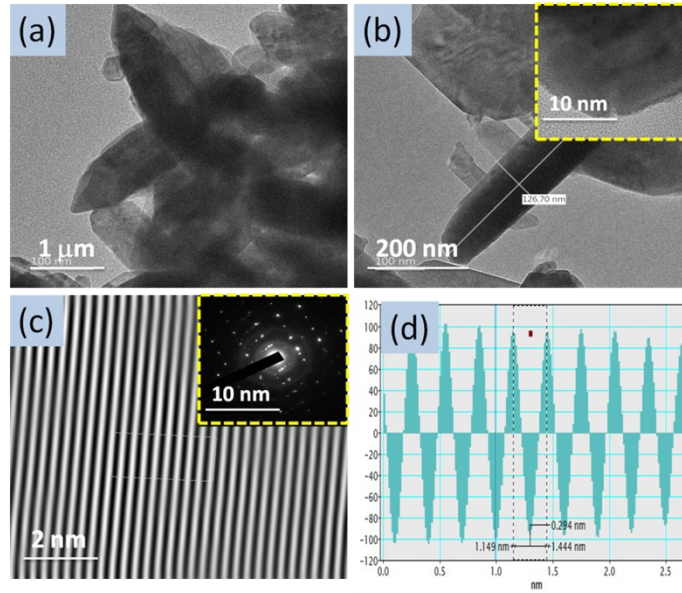

**Fig. S1** (a) TEM image at 1  $\mu\text{m}$  (b) TEM image at 200 nm (inset: HRTEM image at 10 nm), (c) Lattice fringe (inset: SAED pattern) and (d) d-spacing average of **ZnO-9**.

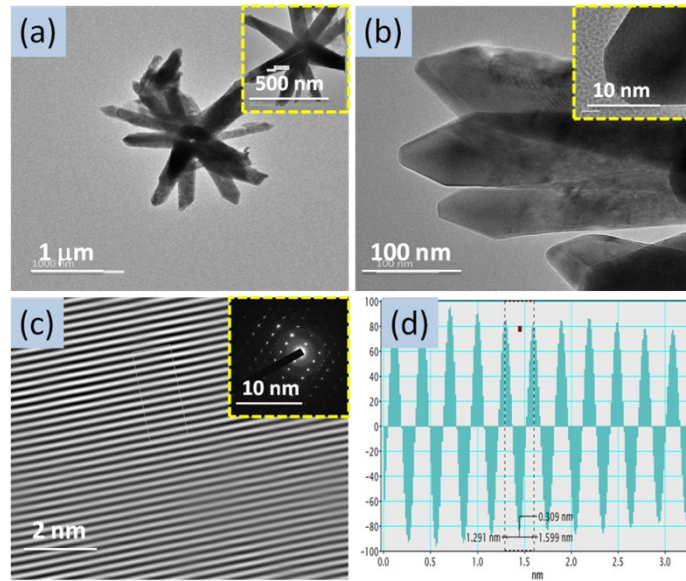

**Fig. S2** (a) TEM image at 1  $\mu\text{m}$  (inset: TEM image at 500 nm), (b) TEM image at 100 nm (inset: HRTEM image at 10 nm), (c) Lattice fringe (inset: SAED pattern) and (d) d-spacing average of **ZnO-12**.

Section-S4: FESEM images of ZnO nanostructures (ZnO-15 to ZnO-17)

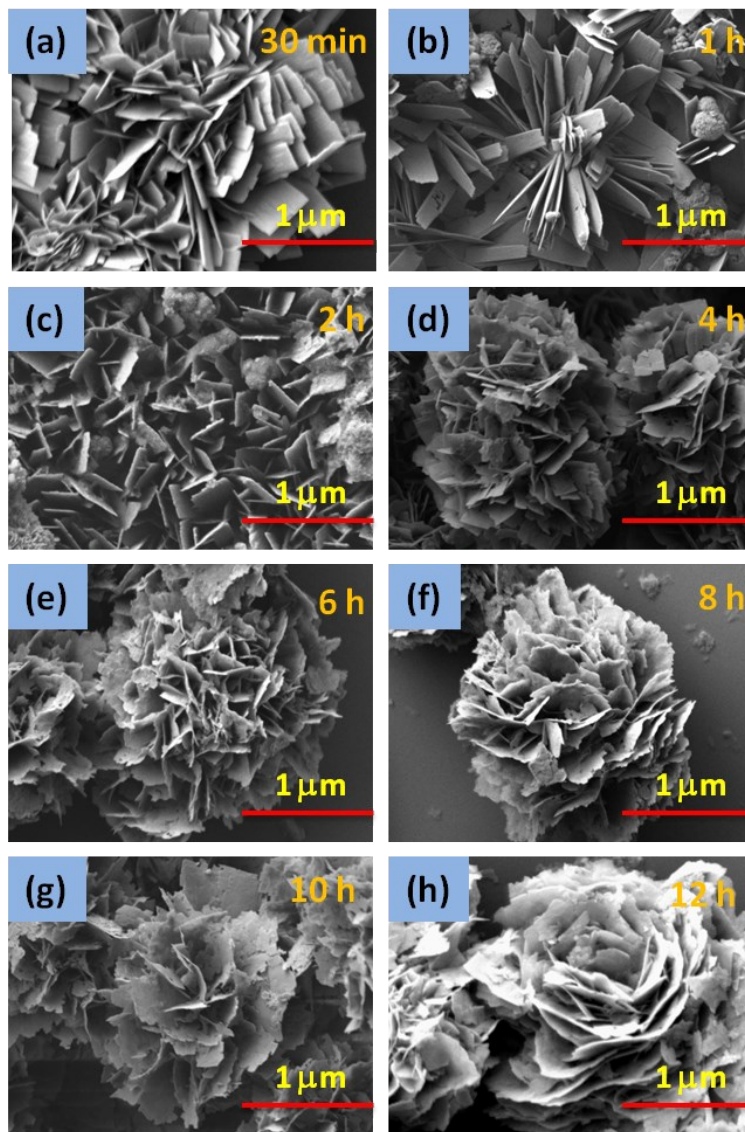

**Fig. S3** (a-h) Formation of 3D ZnO nanoflowers (ZnO-15 at pH = 10) assembled by nanosheets with a variation of growth time from 30 minutes to 12 hours.



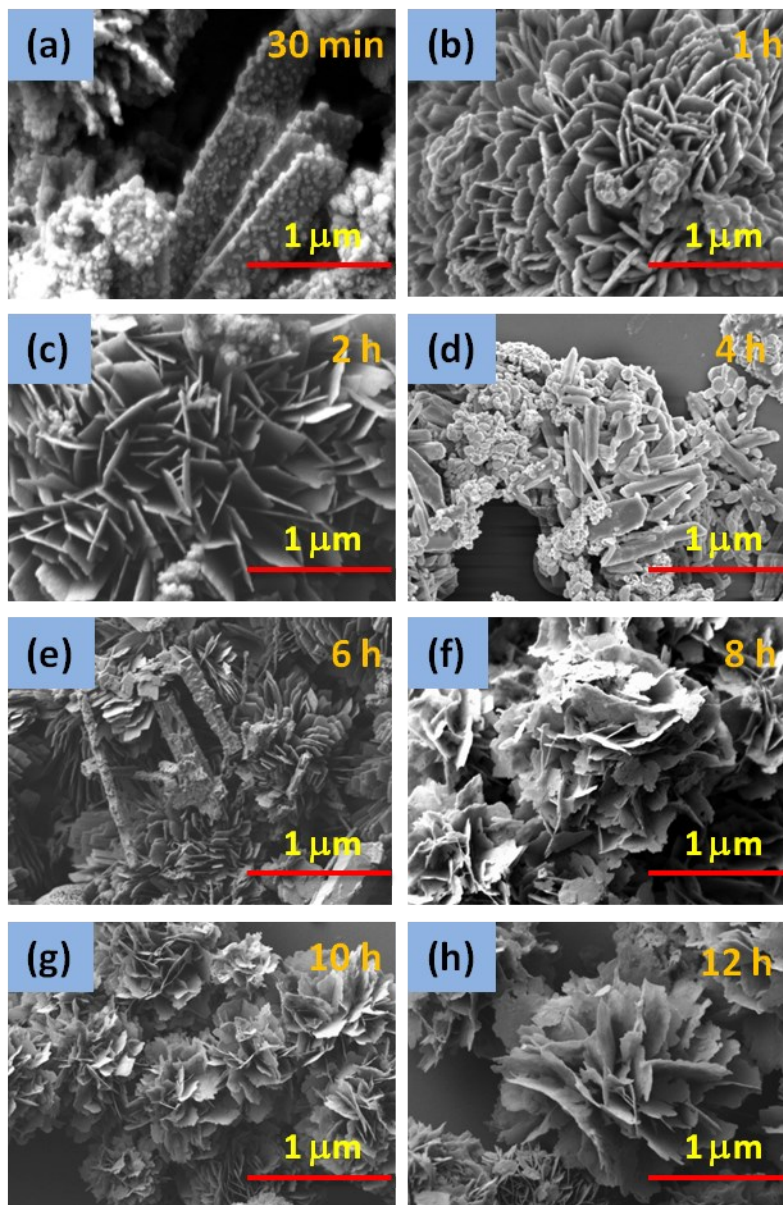

**Fig. S4** (a-h) Formation of 3D ZnO nanoflowers (**ZnO-16** at pH = 11) assembled by nanosheets with a variation of growth time from 30 minutes to 12 hours.

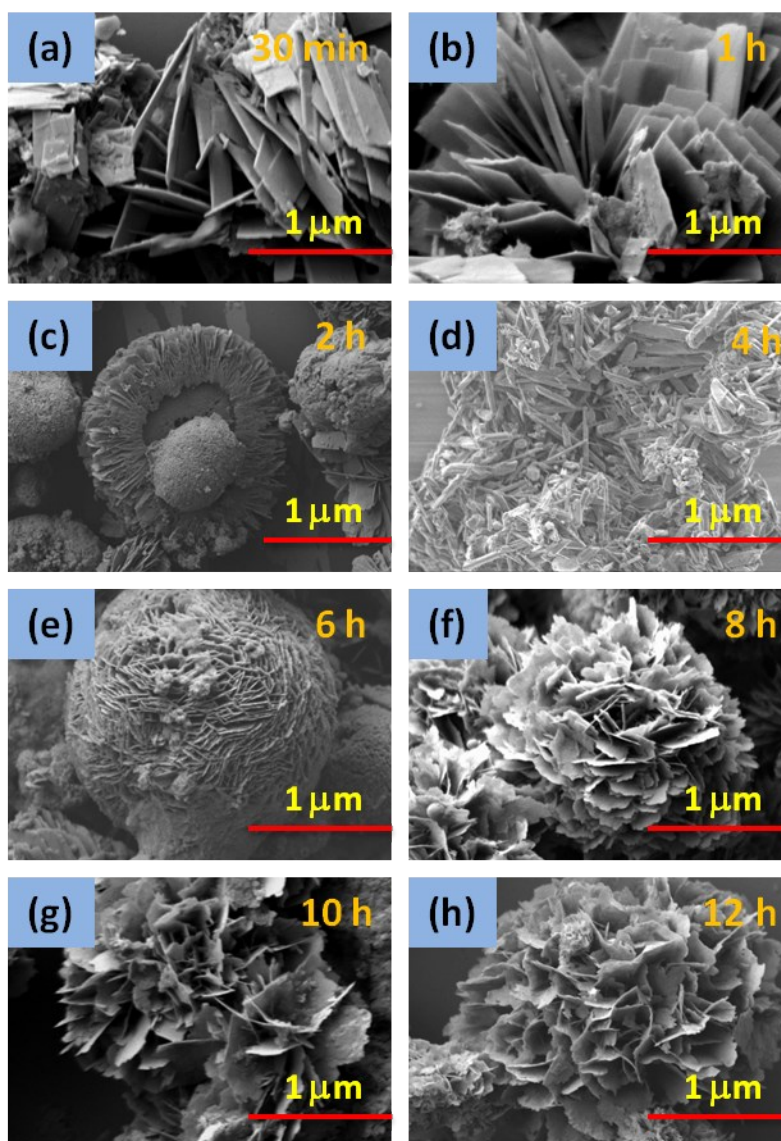

**Fig. S5** (a-h) Formation of 3D ZnO nanoflowers (**ZnO-17** at pH = 12) assembled by nanosheets with a variation of growth time from 30 minutes to 12 hours.
